# Supplementary material
Source: publisher figshare collection journal article supplement (https://frontiersin.figshare.com/ndownloader/files/36011477)

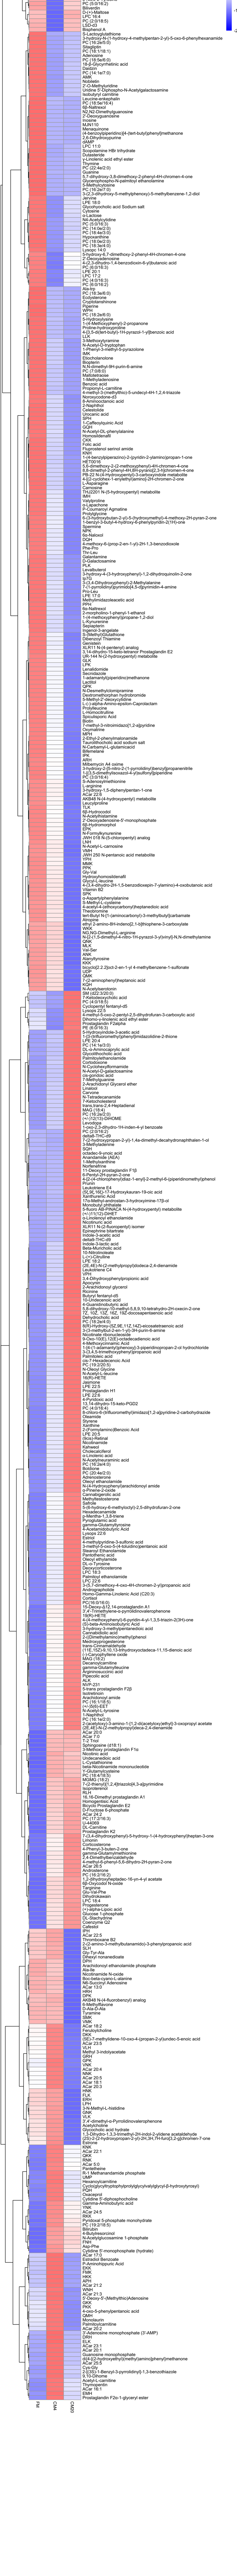



B

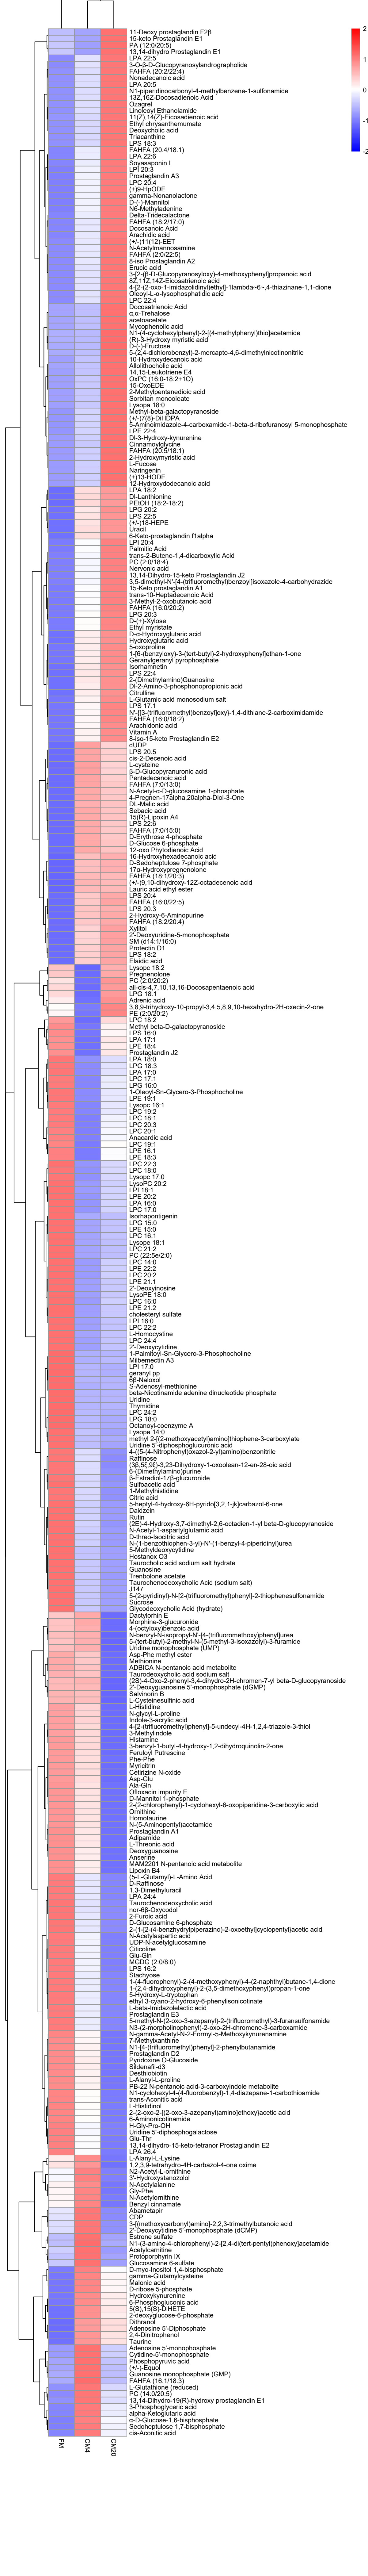

Supplement: Supplementary file 1 [file 36011477]
